# Supplementary material for: Engagement in Prescription Opioid Tapering Research: the EMPOWER Study and a Coproduction Model of Success
Source: PubMed Central journal article supplement (PMC8993995; doi:10.1007/s11606-021-07085-w), 2021-08-13
Supplement: 11606_2021_7085_MOESM2_ESM.pdf [file 11606_2021_7085_MOESM2_ESM.pdf]

# Video Vignettes

Please complete the survey below.

Thank you!

This survey asks for your feedback on video vignettes that will serve as patient education materials for the study.

Please watch the short videos below and answer the related questions.

## Video 1

### Please answer the following questions related to Video 1 .

|                                                                                              | Strongly Disagree     | Disagree              | Neutral               | Agree                 | Strongly Agree        |
|----------------------------------------------------------------------------------------------|-----------------------|-----------------------|-----------------------|-----------------------|-----------------------|
| 1) The video is appropriate for the study                                                    | <input type="radio"/> | <input type="radio"/> | <input type="radio"/> | <input type="radio"/> | <input type="radio"/> |
| 2) The video is a good length                                                                | <input type="radio"/> | <input type="radio"/> | <input type="radio"/> | <input type="radio"/> | <input type="radio"/> |
| 3) The video adequately addresses questions/concerns patients might have                     | <input type="radio"/> | <input type="radio"/> | <input type="radio"/> | <input type="radio"/> | <input type="radio"/> |
| 4) The video will be helpful for patients                                                    | <input type="radio"/> | <input type="radio"/> | <input type="radio"/> | <input type="radio"/> | <input type="radio"/> |
| 5) The video is engaging                                                                     | <input type="radio"/> | <input type="radio"/> | <input type="radio"/> | <input type="radio"/> | <input type="radio"/> |
| 6) Please provide comments and suggestions for video content & editing, implementation, etc. | _____                 |                       |                       |                       |                       |

## Video 2

### Please answer the following questions related to Video 2 .

|                                                                                               | Strongly Disagree     | Disagree              | Neutral               | Agree                 | Strongly Agree        |
|-----------------------------------------------------------------------------------------------|-----------------------|-----------------------|-----------------------|-----------------------|-----------------------|
| 7) The video is appropriate for the study                                                     | <input type="radio"/> | <input type="radio"/> | <input type="radio"/> | <input type="radio"/> | <input type="radio"/> |
| 8) The video is a good length                                                                 | <input type="radio"/> | <input type="radio"/> | <input type="radio"/> | <input type="radio"/> | <input type="radio"/> |
| 9) The video adequately addresses questions patients might have                               | <input type="radio"/> | <input type="radio"/> | <input type="radio"/> | <input type="radio"/> | <input type="radio"/> |
| 10) The video will be helpful for patients                                                    | <input type="radio"/> | <input type="radio"/> | <input type="radio"/> | <input type="radio"/> | <input type="radio"/> |
| 11) Please provide comments and suggestions for video content & editing, implementation, etc. | _____                 |                       |                       |                       |                       |

## Video 3

**Please answer the following questions related to Video 3 .**

|                                                                           | Strongly Disagree     | Disagree              | Neutral               | Agree                 | Strongly Agree        |
|---------------------------------------------------------------------------|-----------------------|-----------------------|-----------------------|-----------------------|-----------------------|
| 12) The video is appropriate for the study                                | <input type="radio"/> | <input type="radio"/> | <input type="radio"/> | <input type="radio"/> | <input type="radio"/> |
| 13) The video is a good length                                            | <input type="radio"/> | <input type="radio"/> | <input type="radio"/> | <input type="radio"/> | <input type="radio"/> |
| 14) The video adequately addresses questions/concerns patients might have | <input type="radio"/> | <input type="radio"/> | <input type="radio"/> | <input type="radio"/> | <input type="radio"/> |
| 15) The video will be helpful for patients                                | <input type="radio"/> | <input type="radio"/> | <input type="radio"/> | <input type="radio"/> | <input type="radio"/> |
| 16) The video is engaging                                                 | <input type="radio"/> | <input type="radio"/> | <input type="radio"/> | <input type="radio"/> | <input type="radio"/> |

17) Please provide comments and suggestions for video content & editing, implementation, etc.

---
